# Supplementary material
Source: PubMed Central journal article supplement (PMC4485591)
Supplement: NIHMS673757-supplement-suppl__tables.pdf [file NIHMS673757-supplement-suppl__tables.pdf]

**Supplementary Table 1.** Genes identified by microarray as differently expressed in amygdala or hippocampus of bLR offspring fostered to bLR mothers (bLR-bLR fostered) versus bLR

| P7 Amygdala, bLR-bLR fostered vs. bLR control            |              |                   |             |                                                                                         |                                                                                                                               |                                                       |
|----------------------------------------------------------|--------------|-------------------|-------------|-----------------------------------------------------------------------------------------|-------------------------------------------------------------------------------------------------------------------------------|-------------------------------------------------------|
| Gene Symbol                                              | Sequence ID  | Corrected P-Value | Fold Change | Comments                                                                                | Description                                                                                                                   | Function                                              |
| <b>Up-Regulated Genes</b>                                |              |                   |             |                                                                                         |                                                                                                                               |                                                       |
| Six3                                                     | NM_023990    | 0.038             | 1.608       | Rattus norvegicus sine oculis homeobox homolog 3 (Drosophila) (Six3), mRNA.             | homeobox protein Six3                                                                                                         | sine oculis homeobox homolog 3                        |
| <b>P14 Amygdala, bLR-bLR fostered vs. bLR control</b>    |              |                   |             |                                                                                         |                                                                                                                               |                                                       |
| Gene Symbol                                              | Sequence ID  | Corrected P-Value | Fold Change | Comments                                                                                | Description                                                                                                                   | Function                                              |
| <b>Down-Regulated Genes</b>                              |              |                   |             |                                                                                         |                                                                                                                               |                                                       |
| Rpl38                                                    | NM_001077592 | 0.018             | -4.229      | Rattus norvegicus ribosomal protein L38 (Rpl38), mRNA.                                  | 60S ribosomal protein L38                                                                                                     | ribosomal protein L38                                 |
| <b>Up-Regulated Genes</b>                                |              |                   |             |                                                                                         |                                                                                                                               |                                                       |
| Bnip3                                                    | NM_053420    | 0.003             | 2.858       | "Rattus norvegicus BCL2/adenovirus E1B 19 kDa-interacting protein 3 (Bnip3), mRNA."     | BCL2/adenovirus E1B 19 kDa-interacting protein 3 nuclear gene for mitochondrial product                                       | BCL2/adenovirus E1B 19 kDa-interacting protein 3      |
| Usp11                                                    | NM_001008861 | 0.005             | 2.932       | Rattus norvegicus ubiquitin specific protease 11 (Usp11), mRNA.                         |                                                                                                                               | ubiquitin specific protease 11                        |
| Cntn1                                                    | NM_057118    | 0.013             | 4.880       | Rattus norvegicus contactin 1 (Cntn1), mRNA.                                            |                                                                                                                               | contactin 1                                           |
| Rad23b                                                   | NM_001025275 | 0.026             | 5.043       | "Rattus norvegicus RAD23b homolog (S. cerevisiae) (Rad23b), mRNA."                      |                                                                                                                               | RAD23b homolog                                        |
| Zdhc5                                                    | NM_001039338 | 0.028             | 3.933       | Rattus norvegicus membrane-associated DHHC5 zinc finger protein (LOC362156), mRNA.      |                                                                                                                               | membrane-associated DHHC5 zinc finger protein         |
| Wdr7                                                     | NM_023975    | 0.049             | 5.804       | Rattus norvegicus WD repeat domain 7 (Wdr7), mRNA.                                      |                                                                                                                               | TGF-beta resistance-associated protein                |
| <b>P14 Hippocampus, bLR-bLR fostered vs. bLR control</b> |              |                   |             |                                                                                         |                                                                                                                               |                                                       |
| Gene Symbol                                              | Sequence ID  | Corrected P-Value | Fold Change | Comments                                                                                | Description                                                                                                                   | Function                                              |
| <b>Down-Regulated Genes</b>                              |              |                   |             |                                                                                         |                                                                                                                               |                                                       |
| Psm5                                                     | NM_017282    | 0.002             | -2.079      | Rattus norvegicus proteasome (prosome, macropain) subunit, alpha type 5 (Psm5), mRNA.   |                                                                                                                               | proteasome (prosome, macropain) subunit, alpha type 5 |
| Dynlrb1                                                  | NM_131910    | 0.018             | -1.656      | Rattus norvegicus dynein, cytoplasmic, light chain 2A (Dnc12a), mRNA.                   | robl/LC7-like; bithoraxoid-like protein; dynein-associated protein RKM23                                                      | dynein, cytoplasmic, light chain 2A                   |
| <b>Up-Regulated Genes</b>                                |              |                   |             |                                                                                         |                                                                                                                               |                                                       |
| Rtn3                                                     | NM_001009953 | 0.029             | 1.668       | Rattus norvegicus reticulon 3 (Rtn3), transcript variant 2, mRNA.                       | isoform A1 is encoded by transcript variant 2                                                                                 | reticulon 3 isoform A1                                |
| Cttn                                                     | NM_021868    | 0.002             | 1.742       | Rattus norvegicus cortactin (Cttn), mRNA.                                               |                                                                                                                               | cortactin isoform B                                   |
| Gabbr1                                                   | NM_031028    | 0.039             | 2.289       | Rattus norvegicus gamma-aminobutyric acid (GABA) B receptor 1 (Gabbr1), mRNA.           | gamma-aminobutyric acid (GABA) B receptor, 1; gamma-aminobutyric acid type B receptor; GABA-BR1h receptor; GABA-BR1i receptor | gamma-aminobutyric acid (GABA) B receptor 1           |
| Cdk5r1                                                   | NM_053891    | 0.021             | 2.462       | Rattus norvegicus cyclin-dependent kinase 5, regulatory subunit 1 (p35) (Cdk5r1), mRNA. |                                                                                                                               | cyclin-dependent kinase 5, regulatory subunit 1       |
| Nelf                                                     | NM_057190    | 0.027             | 1.945       | Rattus norvegicus nasal embryonic LHRH factor (Nelf), mRNA.                             |                                                                                                                               | nasal embryonic LHRH factor                           |
| Cdig1l                                                   | NM_153623    | 0.005             | 2.453       | Rattus norvegicus cadmium-inducible gene 1L (Cdig1l), mRNA.                             |                                                                                                                               | cadmium-inducible gene 1L                             |

**Supplementary Table 2.** Genes identified by microarray as differently expressed in amygdala of bLR offspring cross-fostered to bHR mothers (bLR-bHR fostered) versus bLR offspring raised by their biological mothers (bLR control)

| P7 Amygdala, bLR-bHR cross-fostered vs. bLR control         |              |                   |             |                                                                                                                  |                                                                                                                                                                                                                                            |                                                                            |
|-------------------------------------------------------------|--------------|-------------------|-------------|------------------------------------------------------------------------------------------------------------------|--------------------------------------------------------------------------------------------------------------------------------------------------------------------------------------------------------------------------------------------|----------------------------------------------------------------------------|
| Gene Symbol                                                 | Sequence ID  | Corrected P-Value | Fold Change | Comments                                                                                                         | Description                                                                                                                                                                                                                                | Function                                                                   |
| <b>Down-Regulated Genes</b>                                 |              |                   |             |                                                                                                                  |                                                                                                                                                                                                                                            |                                                                            |
| Ttr                                                         | NM_012681    | 0.003             | -5.759      | "Rattus norvegicus transthyretin (Ttr), mRNA."                                                                   | "Transthyretin (prealbumin, amyloidosis type I)"                                                                                                                                                                                           | transthyretin                                                              |
| <b>Up-Regulated Genes</b>                                   |              |                   |             |                                                                                                                  |                                                                                                                                                                                                                                            |                                                                            |
| Gnb1                                                        | NM_030987    | 0.003             | 2.388       | "Rattus norvegicus guanine nucleotide binding protein, beta 1 (Gnb1), mRNA."                                     | Guanine nucleotide-binding protein beta 1                                                                                                                                                                                                  | "guanine nucleotide-binding protein, beta-1 subunit"                       |
| Ptgds                                                       | NM_013015    | 0.018             | 1.996       | "Rattus norvegicus prostaglandin D2 synthase (Ptgds), mRNA."                                                     | Prostaglandin D synthase                                                                                                                                                                                                                   | prostaglandin H2 D-isomerase                                               |
| <b>P14 Amygdala, bLR-bHR cross-fostered vs. bLR control</b> |              |                   |             |                                                                                                                  |                                                                                                                                                                                                                                            |                                                                            |
| Gene Symbol                                                 | Sequence ID  | Corrected P-Value | Fold Change | Comments                                                                                                         | Description                                                                                                                                                                                                                                | Function                                                                   |
| <b>Up-Regulated Genes</b>                                   |              |                   |             |                                                                                                                  |                                                                                                                                                                                                                                            |                                                                            |
| Gfap                                                        | NM_017009    | 0.012             | 1.912       | "Rattus norvegicus glial fibrillary acidic protein (Gfap), mRNA."                                                | intermediate filament; glial fibrillary acidic protein alpha                                                                                                                                                                               | glial fibrillary acidic protein                                            |
| Krt10                                                       | NM_001008804 | 0.000             | 16.000      | "Rattus norvegicus keratin 10 (Krt10), mRNA."                                                                    | type I keratin KA10                                                                                                                                                                                                                        | keratin 10                                                                 |
| Plp1                                                        | NM_030990    | 0.004             | 2.343       | "Rattus norvegicus proteolipid protein (Plp), mRNA."                                                             | "proteolipid protein (myelin); Proteolipid protein (Pelizaeus-Merzbacher disease spastic paraplegia 2 uncomplicated); Proteolipid protein (Pelizaeus-Merzbacher disease, spastic paraplegia 2, uncomplicated); myelin proteolipid protein" | proteolipid protein                                                        |
| <b>P21 Amygdala, bLR-bHR cross-fostered vs. bLR control</b> |              |                   |             |                                                                                                                  |                                                                                                                                                                                                                                            |                                                                            |
| Gene Symbol                                                 | Sequence ID  | Corrected P-Value | Fold Change | Comments                                                                                                         | Description                                                                                                                                                                                                                                | Function                                                                   |
| <b>Down-Regulated Genes</b>                                 |              |                   |             |                                                                                                                  |                                                                                                                                                                                                                                            |                                                                            |
| Calr                                                        | NM_022399    | 0.029             | -1.662      | "Rattus norvegicus calreticulin (Calr), mRNA."                                                                   |                                                                                                                                                                                                                                            | calreticulin                                                               |
| Dnajc5                                                      | NM_024161    | 0.004             | -2.323      | "Rattus norvegicus Dnaj (Hsp40) homolog, subfamily C, member 5 (Dnajc5), mRNA."                                  |                                                                                                                                                                                                                                            | cysteine string protein                                                    |
| Fdft1                                                       | NM_019238    | 0.019             | -2.415      | "Rattus norvegicus farnesyl diphosphate farnesyl transferase 1 (Fdft1), mRNA."                                   | farnesyl diphosphate farnesyltransferase                                                                                                                                                                                                   | farnesyl diphosphate farnesyl transferase 1                                |
| Gabra3                                                      | NM_017069    | 0.018             | -2.554      | "Rattus norvegicus gamma-aminobutyric acid (GABA-A) receptor, subunit alpha 3 (Gabra3), mRNA."                   | "Gamma-aminobutyric acid (GABA) A receptor, alpha 3; Gamma-aminobutyric acid (GABA) A receptor alpha 3; GABA-A receptor alpha-3 subunit"                                                                                                   | "gamma-aminobutyric acid receptor, subunit alpha 3"                        |
| Hspa5                                                       | NM_013083    | 0.048             | -1.737      | "Rattus norvegicus heat shock 70kDa protein 5 (glucose-regulated protein) (Hspa5), mRNA."                        |                                                                                                                                                                                                                                            | heat shock 70kD protein 5                                                  |
| Ing3                                                        | NM_001034107 | 0.047             | -1.707      | "Rattus norvegicus inhibitor of growth family, member 3 (Ing3), mRNA."                                           |                                                                                                                                                                                                                                            | "inhibitor of growth family, member 3"                                     |
| Park2                                                       | NM_020093    | 0.042             | -1.756      | "Rattus norvegicus parkin (Park2), mRNA."                                                                        |                                                                                                                                                                                                                                            | Parkin                                                                     |
| Pcdhga2                                                     | NM_001037139 | 0.037             | -2.985      | "Rattus norvegicus protocadherin gamma a2 (Pcdhga2), mRNA."                                                      |                                                                                                                                                                                                                                            | protocadherin gamma A2                                                     |
| Slc9a3r1                                                    | NM_021594    | 0.036             | -2.014      | "Rattus norvegicus solute carrier family 9 (sodium/hydrogen exchanger), isoform 3 regulator 1 (Slc9a3r1), mRNA." |                                                                                                                                                                                                                                            | ERM-binding phosphoprotein                                                 |
| Sp1                                                         | NM_012655    | 0.046             | -2.436      | "Rattus norvegicus Sp1 transcription factor (Sp1), mRNA."                                                        |                                                                                                                                                                                                                                            | sp1 transcription factor                                                   |
| Tmem209                                                     | NM_001014055 | 0.013             | -1.989      | "Rattus norvegicus similar to hypothetical protein FLJ14803 (RGD1309682), mRNA."                                 |                                                                                                                                                                                                                                            | hypothetical protein LOC312200                                             |
| <b>Up-Regulated Genes</b>                                   |              |                   |             |                                                                                                                  |                                                                                                                                                                                                                                            |                                                                            |
| Atp5e                                                       | NM_139099    | 0.008             | 4.292       | "Rattus norvegicus ATP synthase, H+ transporting, mitochondrial F1 complex, epsilon subunit (Atp5e), mRNA."      |                                                                                                                                                                                                                                            | "ATP synthase, H+ transporting, mitochondrial F1 complex, epsilon subunit" |
| Atp5i                                                       | NM_080481    | 0.030             | 3.567       | "Rattus norvegicus ATP synthase, H+ transporting, mitochondrial F0 complex, subunit e (Atp5i), mRNA."            | "ATP synthase, H+ transporting, mitochondrial F1F0 complex, subunit e"                                                                                                                                                                     | "ATP synthase, H+ transporting, mitochondrial F0 complex, subunit E"       |
| Atp5l                                                       | NM_212516    | 0.035             | 3.144       | "Rattus norvegicus similar to CG6105-PA (MGC72942), mRNA."                                                       |                                                                                                                                                                                                                                            | "ATP synthase, H+ transporting, mitochondrial F0 complex, subunit G"       |
| Cartpt                                                      | NM_017110    | 0.015             | 2.511       | "Rattus norvegicus cocaine and amphetamine regulated transcript (Cart), mRNA."                                   |                                                                                                                                                                                                                                            | cocaine and amphetamine regulated transcript                               |
| Cox17                                                       | NM_053540    | 0.001             | 3.053       | "Rattus norvegicus cytochrome c oxidase, subunit XVII assembly protein homolog (yeast) (Cox17), mRNA."           |                                                                                                                                                                                                                                            | "COX17 homolog, cytochrome c oxidase assembly protein"                     |

| Gene Symbol                           | Sequence ID  | Corrected P-Value | Fold Change | Comments                                                                                            | Description                                                                                     | Function                                                  |
|---------------------------------------|--------------|-------------------|-------------|-----------------------------------------------------------------------------------------------------|-------------------------------------------------------------------------------------------------|-----------------------------------------------------------|
| <b>Up-Regulated Genes (continued)</b> |              |                   |             |                                                                                                     |                                                                                                 |                                                           |
| Cox5b                                 | NM_053586    | 0.032             | 3.279       | "Rattus norvegicus cytochrome c oxidase subunit Vb (Cox5b), mRNA."                                  |                                                                                                 | cytochrome c oxidase subunit Vb                           |
| Cox7a2                                | NM_022503    | 0.024             | 3.516       | "Rattus norvegicus cytochrome c oxidase, subunit VIIa 2 (Cox7a2), mRNA."                            | cytochrome c oxidase subunit VIIa 3                                                             | "cytochrome c oxidase, subunit 7a 3"                      |
| Cox7b                                 | NM_182819    | 0.004             | 3.055       | "Rattus norvegicus cytochrome c oxidase subunit VIIb (Cox7b), mRNA."                                |                                                                                                 | cytochrome c oxidase subunit VIIb                         |
| Mif                                   | NM_031051    | 0.028             | 2.306       | "Rattus norvegicus macrophage migration inhibitory factor (Mif), mRNA."                             |                                                                                                 | macrophage migration inhibitory factor                    |
| Mrps24                                | NM_001077659 | 0.049             | 2.863       | "Rattus norvegicus mitochondrial ribosomal protein S24 (predicted) (Mrps24_predicted), mRNA."       |                                                                                                 | mitochondrial ribosomal protein S24                       |
| Mt3                                   | NM_053968    | 0.017             | 4.718       | "Rattus norvegicus metallothionein 3 (Mt3), mRNA."                                                  | growth inhibitory factor; metallothionein III                                                   | metallothionein 3                                         |
| Ndufa11                               | NM_212517    | 0.017             | 3.178       | "Rattus norvegicus NADH dehydrogenase (ubiquinone) 1 alpha subcomplex 11 (Ndufa11), mRNA."          | NADH-ubiquinone oxidoreductase subunit B14.7; RE70703p-like                                     | NADH dehydrogenase (ubiquinone) 1 alpha subcomplex 11     |
| Ndufs7                                | NM_001008525 | 0.035             | 3.106       | "Rattus norvegicus NADH dehydrogenase (ubiquinone) Fe-S protein 7 (Ndufs7), mRNA."                  | NADH-ubiquinone oxidoreductase Fe-S protein 7                                                   | NADH dehydrogenase (ubiquinone) Fe-S protein 7            |
| Nenf                                  | NM_001002851 | 0.007             | 2.420       | "Rattus norvegicus neuron derived neurotrophic factor (Nenf), mRNA."                                | neudessin; secreted protein of unknown function; Spinal cord injury related protein 10          | SCIRP10-related protein                                   |
| Rpl13                                 | NM_031101    | 0.037             | 2.207       | "Rattus norvegicus ribosomal protein L13 (Rpl13), mRNA."                                            |                                                                                                 | ribosomal protein L13                                     |
| Rpl23                                 | NM_001007599 | 0.043             | 2.726       | "Rattus norvegicus ribosomal protein L23 (Rpl23), mRNA."                                            |                                                                                                 | ribosomal protein L23                                     |
| Rpl35a                                | NM_021264    | 0.004             | 2.380       | "Rattus norvegicus ribosomal protein L35a (Rpl35a), mRNA."                                          |                                                                                                 | ribosomal protein L35a                                    |
| Rpl38                                 | NM_001077592 | 0.015             | 3.498       | "Rattus norvegicus ribosomal protein L38 (Rpl38), mRNA."                                            | 60S ribosomal protein L38                                                                       | ribosomal protein L38                                     |
| Rps14                                 | NM_022672    | 0.000             | 3.076       | "Rattus norvegicus ribosomal protein S14 (Rps14), mRNA."                                            |                                                                                                 | ribosomal protein S14                                     |
| Rps15a                                | NM_053982    | 0.002             | 2.660       | "Rattus norvegicus ribosomal protein S15a (Rps15a), mRNA."                                          |                                                                                                 | ribosomal protein S15a                                    |
| Rps19                                 | NM_001037346 | 0.000             | 3.326       | "Rattus norvegicus ribosomal protein S19 (Rps19), mRNA."                                            |                                                                                                 | ribosomal protein S19                                     |
| Rps21                                 | NM_031111    | 0.041             | 3.565       | "Rattus norvegicus ribosomal protein S21 (Rps21), mRNA."                                            |                                                                                                 | ribosomal protein S21                                     |
| Rps23                                 | NM_078617    | 0.023             | 2.675       | "Rattus norvegicus ribosomal protein S23 (Rps23), mRNA."                                            |                                                                                                 | ribosomal protein S23                                     |
| Rps26                                 | NM_013224    | 0.002             | 2.641       | "Rattus norvegicus ribosomal protein S26 (Rps26), mRNA."                                            |                                                                                                 | ribosomal protein S26                                     |
| Sepw1                                 | NM_013027    | 0.016             | 2.629       | "Rattus norvegicus selenoprotein W, muscle 1 (Sepw1), mRNA."                                        |                                                                                                 | "selenoprotein W, 1"                                      |
| Sst                                   | NM_012659    | 0.000             | 3.219       | "Rattus norvegicus somatostatin (Sst), mRNA."                                                       |                                                                                                 | somatostatin                                              |
| Tceb2                                 | NM_031129    | 0.024             | 2.465       | "Rattus norvegicus transcription elongation factor B (SIII), polypeptide 2 (Tceb2), mRNA."          | "transcription elongation factor B (SIII) polypeptide 2 (18kD, elongin B)"                      | "transcription elongation factor B (SIII), polypeptide 2" |
| Timm8b                                | NM_022541    | 0.002             | 2.711       | "Rattus norvegicus translocase of inner mitochondrial membrane 8 homolog b (yeast) (Timm8b), mRNA." | Tim8b; similar to the yeast Tim10/Tim12/DDP protein family; small zinc finger-like protein DDP2 | translocase of inner mitochondrial membrane 8 homolog b   |
| Uba52                                 | NM_031687    | 0.009             | 2.828       | "Rattus norvegicus ubiquitin A-52 residue ribosomal protein fusion product 1 (Uba52), mRNA."        |                                                                                                 | ubiquitin A-52 residue ribosomal protein fusion product 1 |
| Ubl5                                  | NM_001048243 | 0.002             | 2.452       | "Rattus norvegicus Ubiquitin-Like 5 Protein (LOC500954), mRNA."                                     |                                                                                                 | ubiquitin-like 5 protein                                  |
| Usmg5                                 | NM_133544    | 0.036             | 3.388       | "Rattus norvegicus upregulated during skeletal muscle growth 5 (Usmg5), mRNA."                      | diabetes-associated protein in insulin-sensitive tissues                                        | dapit protein                                             |

**Supplementary Table 3.** Gene clusters from adult amygdala microarray data that were differentially expressed in bLR offspring cross-fostered to bHR mothers versus bLR controls (raised by biological bLR mothers)

| Cluster 1   |              |                   |             |                                                                                                                            |                                                                                                                 |                                                                                         |
|-------------|--------------|-------------------|-------------|----------------------------------------------------------------------------------------------------------------------------|-----------------------------------------------------------------------------------------------------------------|-----------------------------------------------------------------------------------------|
| Gene Symbol | Sequence ID  | Corrected P-Value | Fold Change | Comments                                                                                                                   | Description                                                                                                     | Function                                                                                |
| Cds2        | NM_053643    | 0.005             | 5.250       | Rattus norvegicus CDP-diacylglycerol synthase (phosphatidate cytidyltransferase) 2 (Cds2), mRNA.                           |                                                                                                                 | phosphatidate cytidyltransferase 2                                                      |
| Cirbp       | NM_031147    | 0.020             | 1.977       | Rattus norvegicus cold inducible RNA binding protein (Cirbp), mRNA.                                                        | cold inducible RNA-binding protein                                                                              | cold inducible RNA binding protein                                                      |
| Clstn3      | NM_134376    | 0.011             | 2.645       | Rattus norvegicus calysntenin 3 (Clstn3),                                                                                  |                                                                                                                 | calysntenin 3                                                                           |
| Cpt1a       | NM_031559    | 0.038             | 3.856       | Rattus norvegicus carnitine palmitoyltransferase 1a, liver (Cpt1a), mRNA.                                                  | Carnitine palmitoyltransferase 1 alpha, liver isoform                                                           | carnitine palmitoyltransferase 1, liver                                                 |
| Def8        | NM_001024774 | 0.002             | 2.577       | Rattus norvegicus differentially expressed in FDCP 8 (Def8), mRNA.                                                         |                                                                                                                 | differentially expressed in FDCP 8                                                      |
| Dlg4        | NM_019621    | 0.016             | 3.248       | Rattus norvegicus discs, large homolog 4 (Drosophila) (Dlg4), mRNA.                                                        | discs large homolog 4; synapse-associated protein SAP90                                                         | postsynaptic density protein 95                                                         |
| Dvl1        | NM_031820    | 0.015             | 2.753       | Rattus norvegicus dishevelled, dsh homolog 1 (Drosophila) (Dvl1), mRNA.                                                    | dishevelled 1; dishevelled-1                                                                                    | dishevelled, dsh homolog 1                                                              |
| Jph4        | NM_001003711 | 0.042             | 2.750       | Rattus norvegicus junctophilin 4 (Jph4),                                                                                   |                                                                                                                 | junctophilin 4                                                                          |
| Mapre3      | NM_001007656 | 0.024             | 1.565       | Rattus norvegicus microtubule-associated protein, RP/EB family, member 3 (Mapre3), mRNA.                                   |                                                                                                                 | microtubule-associated protein, RP/EB family, member 3                                  |
| Nelf        | NM_057190    |                   |             | Rattus norvegicus nasal embryonic LHRH factor (Nelf), mRNA.                                                                |                                                                                                                 | nasal embryonic LHRH factor                                                             |
| Olr836      | NM_001000406 | 0.013             | -2.995      | Rattus norvegicus olfactory receptor 836 (predicted) (Olr836_predicted), mRNA.                                             | olfactory receptor gene Olr836                                                                                  | olfactory receptor Olr836                                                               |
| Pomgnt1     | NM_001007747 | 0.039             | 1.973       | Rattus norvegicus protein O-linked mannose beta1,2-N-acetylglucosaminyltransferase (Pomgnt1), mRNA.                        |                                                                                                                 | O-linked mannose beta1,2-N-acetylglucosaminyltransferase                                |
| Prkar1b     | NM_001033679 | 0.049             | 2.514       | Rattus norvegicus protein kinase, cAMP dependent regulatory, type I, beta (Prkar1b), mRNA.                                 | cAMP dependent protein kinase, subunit type 1 beta                                                              | protein kinase, cAMP dependent regulatory, type I, beta                                 |
| Uhmk1       | NM_017293    | 0.002             | 5.810       | Rattus norvegicus UZAF homology motif (UHM) kinase 1 (Uhmk1), mRNA.                                                        | kinase interacting with leukemia-associated gene (stathmin); PAM COOH-terminal                                  | KIS                                                                                     |
| Vdac1       | NM_031353    | 0.046             | 2.185       | Rattus norvegicus voltage-dependent anion channel 1 (Vdac1), mRNA.                                                         |                                                                                                                 | voltage-dependent anion channel 1                                                       |
| Zfyve27     | NM_199104    | 0.023             | 2.167       | Rattus norvegicus zinc finger, FYVE domain containing 27 (Zfyve27), mRNA.                                                  |                                                                                                                 | zinc finger, FYVE domain containing 27                                                  |
| Cluster 2   |              |                   |             |                                                                                                                            |                                                                                                                 |                                                                                         |
| Gene Symbol | Sequence ID  | Corrected P Value | Fold Change | Comments                                                                                                                   | Description                                                                                                     | Function                                                                                |
| App         | NM_019288    | 0.044             | 1.598       | Rattus norvegicus amyloid beta (A4) precursor protein (App), mRNA.                                                         |                                                                                                                 | amyloid beta (A4) precursor protein                                                     |
| Camk2a      | NM_012920    | 0.001             | 2.411       | Rattus norvegicus calcium/calmodulin-dependent protein kinase II, alpha (Camk2a),                                          | Ca2+/calmodulin-dependent protein kinase II alpha; alpha CaM kinase II                                          | calcium/calmodulin-dependent protein kinase II alpha subunit                            |
| Car12       | NM_001080756 | 0.023             | 3.092       | Rattus norvegicus carbonic anhydrase 12 (Car12), mRNA.                                                                     | membrane-bound carbonic anhydrase 12                                                                            | carbonic anhydrase 12                                                                   |
| Cntnap1     | NM_032061    | 0.002             | 2.433       | Rattus norvegicus contactin associated protein 1 (Cntnap1), mRNA.                                                          |                                                                                                                 | contactin associated protein 1                                                          |
| Cx3cl1      | NM_134455    | 0.000             | 3.487       | Rattus norvegicus chemokine (C-X3-C motif) ligand 1 (Cx3cl1), mRNA.                                                        | fractalkine; small inducible cytokine subfamily D, 1                                                            | chemokine (C-X3-C motif) ligand 1                                                       |
| Fbxl16      | NM_001009504 | 0.034             | 3.850       | Rattus norvegicus F-box and leucine-rich repeat protein 16 (Fbxl16), mRNA.                                                 | spinal cord injury and regeneration related 1                                                                   | F-box and leucine-rich repeat protein 16                                                |
| Gabra1      | NM_183326    | 0.013             | 2.548       | Rattus norvegicus gamma-aminobutyric acid A receptor, alpha 1 (Gabra1), mRNA.                                              | gamma-aminobutyric acid (GABA-A) receptor subunit alpha 1; gamma-                                               | gamma-aminobutyric acid A receptor, alpha 1                                             |
| Hrh3        | NM_053506    | 0.011             | 2.168       | Rattus norvegicus histamine receptor H3 (Hrh3), mRNA.                                                                      |                                                                                                                 | histamine receptor H3                                                                   |
| Kcnab2      | NM_017304    | 0.002             | 3.841       | Rattus norvegicus potassium voltage-gated channel, shaker-related subfamily, beta member 2 (Kcnab2), mRNA.                 | potassium voltage gated channel, shaker related subfamily, beta member 2                                        | potassium voltage-gated channel, shaker-related subfamily, beta member 2                |
| Ncdn        | NM_053543    | 0.007             | 2.572       | Rattus norvegicus neurochondrin (Ncdn),                                                                                    |                                                                                                                 | neurochondrin                                                                           |
| Nptxr       | NM_030841    | 0.001             | 4.964       | Rattus norvegicus neuronal pentraxin receptor (Nptxr), mRNA.                                                               | non-AUG (CUG) translation initiation codon                                                                      | neuronal pentraxin receptor                                                             |
| Nrn1        | NM_053346    | 0.030             | 3.296       | Rattus norvegicus neuritin (Nrn1), mRNA.                                                                                   |                                                                                                                 | neuritin                                                                                |
| Nsf         | NM_021748    | 0.001             | 2.275       | Rattus norvegicus N-ethylmaleimide sensitive fusion protein (Nsf), mRNA.                                                   | N-ethylmaleimide sensitive factor                                                                               | N-ethylmaleimide sensitive fusion protein                                               |
| Pde2a       | NM_031079    | 0.021             | 2.362       | Rattus norvegicus phosphodiesterase 2A, cGMP-stimulated (Pde2a), mRNA.                                                     | cyclic GMP stimulated phosphodiesterase                                                                         | phosphodiesterase 2A, cGMP-stimulated                                                   |
| Phyhip      | NM_001017376 | 0.001             | 3.229       | Rattus norvegicus phytanoyl-CoA hydroxylase interacting protein (Phyhip), mRNA.                                            |                                                                                                                 | phytanoyl-CoA hydroxylase interacting protein                                           |
| Pip5k1a     | NM_001042621 | 0.034             | 2.869       | Rattus norvegicus phosphatidylinositol-4-phosphate 5-kinase, type 1, alpha (predicted) (Pip5k1a_predicted), mRNA.          | phosphatidylinositol-4-phosphate 5-kinase, type 1 beta; phosphatidylinositol-4-phosphate 5-kinase, type 1 alpha | phosphatidylinositol-4-phosphate 5-kinase, type 1, alpha                                |
| Prepl       | NM_001010951 | 0.037             | 2.081       | Rattus norvegicus similar to RIKEN cDNA D030028016 (RGD1310143), mRNA.                                                     |                                                                                                                 | prolyl endopeptidase-like                                                               |
| Selplg      | NM_001013230 | 0.020             | 2.462       | Rattus norvegicus selectin, platelet (p-selectin) ligand (predicted) (Selpl_predicted),                                    | P-selectin glycoprotein ligand; leukocyte cell surface adhesion molecule                                        | selectin, platelet (p-selectin) ligand (predicted)                                      |
| Slc17a7     | NM_053859    | 0.010             | 2.731       | Rattus norvegicus solute carrier family 17 (sodium-dependent inorganic phosphate cotransporter), member 7 (Slc17a7), mRNA. | vesicular glutamate transporter 1; brain-specific Na-dependent inorganic phosphate cotransporter                | solute carrier family 17 (sodium-dependent inorganic phosphate cotransporter), member 7 |
| Syp         | NM_012664    | 0.028             | 2.475       | Rattus norvegicus synaptophysin (Syp), mRNA.                                                                               |                                                                                                                 | synaptophysin                                                                           |
| Ubl3        | NM_001015030 | 0.010             | 1.776       | Rattus norvegicus ubiquitin-like 3 (Ubl3),                                                                                 |                                                                                                                 | ubiquitin-like 3                                                                        |
| Ugt8        | NM_019276    | 0.001             | 2.072       | Rattus norvegicus UDP galactosyltransferase 8 (Ugt8), mRNA.                                                                |                                                                                                                 | UDP-glucuronosyltransferase 8                                                           |

| Cluster 3   |              |                   |             |                                                                                                                     |                                                                                                                                                                                            |                                                                                  |
|-------------|--------------|-------------------|-------------|---------------------------------------------------------------------------------------------------------------------|--------------------------------------------------------------------------------------------------------------------------------------------------------------------------------------------|----------------------------------------------------------------------------------|
| Gene Symbol | Sequence ID  | Corrected P Value | Fold Change | Comments                                                                                                            | Description                                                                                                                                                                                | Function                                                                         |
| Ablim1      | NM_001044394 | 0.016             | 2.683       | Rattus norvegicus actin-binding LIM protein 1 (predicted) (Ablim1_predicted), mRNA.                                 |                                                                                                                                                                                            | actin-binding LIM protein 1                                                      |
| Add1        | NM_016990    | 0.037             | 3.188       | Rattus norvegicus adducin 1 (alpha) (Add1), mRNA.                                                                   | alpha-ADD                                                                                                                                                                                  | adducin 1 (alpha)                                                                |
| Adora1      | NM_017155    | 0.023             | 3.519       | Rattus norvegicus adenosine A1 receptor (Adora1), mRNA.                                                             |                                                                                                                                                                                            | adenosine A1 receptor                                                            |
| Akt2        | NM_017093    | 0.003             | 2.152       | Rattus norvegicus thymoma viral proto-oncogene 2 (Akt2), mRNA.                                                      | RAC protein kinase beta RAC-PK beta; protein kinase B beta                                                                                                                                 | murine thymoma viral (v-akt) oncogene homolog 2                                  |
| Arf3        | NM_080904    | 0.006             | 2.656       | Rattus norvegicus ADP-ribosylation factor 3 (Arf3), mRNA.                                                           |                                                                                                                                                                                            | ADP-ribosylation factor 3                                                        |
| Atf2        | NM_031018    | 0.046             | 2.067       | Rattus norvegicus activating transcription factor 2 (Atf2), mRNA.                                                   |                                                                                                                                                                                            | activating transcription factor 2                                                |
| Atp2b4      | NM_001005871 | 0.005             | 5.701       | Rattus norvegicus ATPase, Ca++ transporting, plasma membrane 4 (Atp2b4), mRNA.                                      | plasma membrane Ca2+-ATPases 4                                                                                                                                                             | plasma membrane calcium ATPase 4                                                 |
| Atp6v0a1    | NM_031604    | 0.023             | 3.204       | Rattus norvegicus ATPase, H+ transporting, lysosomal V0 subunit A1 (Atp6v0a1), mRNA.                                | ATPase, H+ transporting, lysosomal noncatalytic accessory protein 1a; v-H+ATPase subunit a1; vacuolar proton pump; ATPase, H+ transporting, lysosomal V0 subunit a; ATPase H+ transporting | ATPase, H+ transporting, lysosomal V0 subunit a isoform 1                        |
| Bcat1       | NM_017253    | 0.012             | 2.656       | Rattus norvegicus branched chain aminotransferase 1, cytosolic (Bcat1), mRNA.                                       |                                                                                                                                                                                            | branched chain aminotransferase 1, cytosolic                                     |
| Bcl2l1      | NM_001033670 | 0.045             | 2.537       | Rattus norvegicus Bcl2-like 1 (Bcl2l1), transcript variant 3, mRNA.                                                 | isoform 2 is encoded by transcript variant 3; B cell lymphoma 2 like; B cell lymphoma like                                                                                                 | Bcl2-like 1 isoform 2                                                            |
| Camkv       | NM_024000    | 0.000             | 4.046       | Rattus norvegicus CaM kinase-like vesicle-associated (Camkv), mRNA.                                                 |                                                                                                                                                                                            | vesicle-associated calmodulin-binding protein                                    |
| Cap1        | NM_022383    | 0.011             | 2.420       | Rattus norvegicus CAP, adenylate cyclase-associated protein 1 (yeast) (Cap1), mRNA.                                 | cyclase-associated protein homologue                                                                                                                                                       | CAP, adenylate cyclase-associated protein 1                                      |
| Carm1       | NM_001030041 | 0.049             | 2.154       | Rattus norvegicus protein arginine N-methyltransferase 4 (Prmt4), transcript variant 1, mRNA.                       | isoform a is encoded by transcript variant 1; coactivator-associated arginine methyltransferase 1                                                                                          | coactivator-associated arginine methyltransferase 1 isoform a                    |
| Cbx6        | NM_001012119 | 0.006             | 3.690       | Rattus norvegicus chromobox homolog 6 (Cbx6), mRNA.                                                                 |                                                                                                                                                                                            | chromobox homolog 6                                                              |
| Cd164       | NM_031812    | 0.015             | 3.794       | Rattus norvegicus CD164 antigen (Cd164),                                                                            |                                                                                                                                                                                            | endolyn                                                                          |
| Cntn1       | NM_057118    | 0.006             | 3.750       | Rattus norvegicus contactin 1 (Cntn1), mRNA.                                                                        |                                                                                                                                                                                            | contactin 1                                                                      |
| Dclk1       | NM_053343    | 0.022             | 3.021       | Rattus norvegicus doublecortin-like kinase 1 (Dclk1), mRNA.                                                         | double cortin and calcium/calmodulin-dependent protein kinase-like 1                                                                                                                       | doublecortin-like kinase 1                                                       |
| Dlg3        | NM_031639    | 0.005             | 2.515       | Rattus norvegicus discs, large homolog 3 (Drosophila) (Dlg3), mRNA.                                                 | discs large homolog 3                                                                                                                                                                      | synapse-associated protein 102                                                   |
| Dnajc5      | NM_024161    | 0.023             | 3.331       | Rattus norvegicus Dnaj (Hsp40) homolog, subfamily C, member 5 (Dnajc5), mRNA.                                       |                                                                                                                                                                                            | cysteine string protein                                                          |
| Dpp6        | NM_022850    | 0.000             | 2.794       | Rattus norvegicus dipeptidylpeptidase 6 (Dpp6), mRNA.                                                               |                                                                                                                                                                                            | dipeptidylpeptidase 6                                                            |
| Dstyk       | NM_199463    | 0.017             | 4.410       | Rattus norvegicus receptor interacting protein kinase 5 (Ripk5), mRNA.                                              | dusty protein kinase                                                                                                                                                                       | receptor interacting protein kinase 5                                            |
| Fnbp1       | NM_138914    | 0.006             | 2.697       | Rattus norvegicus formin binding protein 1 (Fnbp1), mRNA.                                                           |                                                                                                                                                                                            | rapostlin                                                                        |
| Freq        | NM_024366    | 0.014             | 3.961       | Rattus norvegicus frequenin homolog (Drosophila) (Freq), mRNA.                                                      |                                                                                                                                                                                            | neuronal calcium sensor-1                                                        |
| Gabbr1      | NM_031028    | 0.017             | 3.154       | Rattus norvegicus gamma-aminobutyric acid (GABA) B receptor 1 (Gabbr1), mRNA.                                       | gamma-aminobutyric acid (GABA) B receptor, 1; gamma-aminobutyric acid type B receptor; GABA-BR1h receptor; GABA-                                                                           | gamma-aminobutyric acid (GABA) B receptor 1                                      |
| Gja1        | NM_012567    | 0.005             | 4.013       | Rattus norvegicus gap junction membrane channel protein alpha 1 (Gja1), mRNA.                                       | gap junction protein, alpha 1, 43 kD; connexin 43; Gap junction protein alpha 1 43 kD (connexin 43); Gap junction protein,                                                                 | gap junction membrane channel protein alpha 1                                    |
| Glul        | NM_017073    | 0.017             | 2.540       | Rattus norvegicus glutamate-ammonia ligase (glutamine synthase) (Glul), mRNA.                                       | Glutamine synthetase (glutamate-ammonia ligase)                                                                                                                                            | glutamine synthetase 1                                                           |
| Ipk6k1      | NM_053316    | 0.006             | 5.171       | Rattus norvegicus inositol hexaphosphate kinase 1 (Ipk1), mRNA.                                                     | inositol hexakisphosphate kinase 6                                                                                                                                                         | inositol hexaphosphate kinase 1                                                  |
| Map2k7      | NM_001025425 | 0.044             | 3.167       | Rattus norvegicus mitogen activated protein kinase kinase 7 (Map2k7), mRNA.                                         |                                                                                                                                                                                            | mitogen activated protein kinase kinase 7                                        |
| Mmd         | NM_001007673 | 0.001             | 2.229       | Rattus norvegicus monocyte to macrophage differentiation-associated (Mmd), mRNA.                                    | macrophage/microglia activation-associated factor                                                                                                                                          | monocyte to macrophage differentiation-associated                                |
| Ndr3        | NM_001013923 | 0.003             | 1.913       | Rattus norvegicus similar to Ndr3 protein (LOC296318), mRNA.                                                        |                                                                                                                                                                                            | similar to Ndr3 protein                                                          |
| Ogdh        | NM_001017461 | 0.021             | 2.553       | Rattus norvegicus similar to oxoglutarate dehydrogenase (lipoamide) (LOC360975),                                    |                                                                                                                                                                                            | hypothetical protein LOC360975                                                   |
| Opcml       | NM_053848    | 0.047             | 3.031       | Rattus norvegicus opioid binding protein/cell adhesion molecule-like (Opcml), mRNA.                                 |                                                                                                                                                                                            | opioid-binding protein/cell adhesion molecule-like                               |
| Pcyox1      | NM_145085    | 0.002             | 3.440       | Rattus norvegicus prenylcysteine oxidase 1 (Pcyox1), mRNA.                                                          |                                                                                                                                                                                            | chloride ion pump-associated 55 kDa protein                                      |
| Pip5k1c     | NM_001009967 | 0.004             | 2.487       | Rattus norvegicus phosphatidylinositol-4-phosphate 5-kinase, type I, gamma (Pip5k1c), transcript variant c, mRNA.   | isoform c is encoded by transcript variant c                                                                                                                                               | phosphatidylinositol-4-phosphate 5-kinase, type I, gamma isoform c               |
| Pip5k1c     | NM_001033970 | 0.002             | 3.683       | Rattus norvegicus phosphatidylinositol-4-phosphate 5-kinase, type I, gamma (Pip5k1c), transcript variant b, mRNA.   | isoform b is encoded by transcript variant b                                                                                                                                               | phosphatidylinositol-4-phosphate 5-kinase, type I, gamma isoform b               |
| Pom121      | NM_053622    | 0.010             | 3.763       | Rattus norvegicus nuclear pore membrane glycoprotein 121 (Pom121), mRNA.                                            | nuclear pore membrane glycoprotein 121 kD                                                                                                                                                  | nuclear pore membrane glycoprotein 121                                           |
| Ppp2r2c     | NM_057116    | 0.003             | 4.124       | Rattus norvegicus protein phosphatase 2 (formerly 2A), regulatory subunit B (PR 52), gamma isoform (Ppp2r2c), mRNA. |                                                                                                                                                                                            | protein phosphatase 2 (formerly 2A), regulatory subunit B (PR 52), gamma isoform |

| Cluster 3 (continued) |              |                   |             |                                                                                                                            |                                                                                                                                                                                                                                |                                                                                           |
|-----------------------|--------------|-------------------|-------------|----------------------------------------------------------------------------------------------------------------------------|--------------------------------------------------------------------------------------------------------------------------------------------------------------------------------------------------------------------------------|-------------------------------------------------------------------------------------------|
| Prkacb                | NM_001077645 | 0.002             | 3.814       | Rattus norvegicus protein kinase, cAMP dependent, catalytic, beta (Prkacb), mRNA.                                          |                                                                                                                                                                                                                                | protein kinase, cAMP dependent, catalytic, beta                                           |
| Ptprn2                | NM_031600    | 0.003             | 2.686       | Rattus norvegicus protein tyrosine phosphatase, receptor type, N polypeptide 2 (Ptprn2), mRNA.                             | protein tyrosine phosphatase, receptor-type, N polypeptide 2; protein tyrosine phosphatase receptor-type N polypeptide 2                                                                                                       | protein tyrosine phosphatase, receptor type, N polypeptide 2                              |
| Rnf44                 | NM_001024795 | 0.036             | 3.296       | Rattus norvegicus ring finger protein 44 (Rnf44), mRNA.                                                                    |                                                                                                                                                                                                                                | ring finger protein 44                                                                    |
| Sirpa                 | NM_013016    | 0.007             | 4.151       | Rattus norvegicus protein tyrosine phosphatase, non-receptor type substrate 1 (Ptpps1), mRNA.                              | Protein tyrosine phosphatase non-receptor type substrate 1 (SHP substrate 1); Brain immunoglobulin like protein with tyrosine-based activation motifs; protein tyrosine phosphatase non-receptor type substrate 1;             | signal-regulatory protein alpha                                                           |
| Slc1a3                | NM_019225    | 0.004             | 3.004       | Rattus norvegicus solute carrier family 1 (glial high affinity glutamate transporter), member 3 (Slc1a3), mRNA.            | glutamate transporter; glutamate/aspartate transporter; solute carrier family 1, member 3                                                                                                                                      | solute carrier family 1 (glial high affinity glutamate transporter), member 3             |
| Slc6a17               | NM_001033079 | 0.005             | 3.334       | Rattus norvegicus solute carrier family 6 (neurotransmitter transporter), member 17 (Slc6a17), mRNA.                       |                                                                                                                                                                                                                                | solute carrier family 6 (neurotransmitter transporter), member 17                         |
| Stx1b                 | NM_012700    | 0.013             | 4.310       | Rattus norvegicus syntaxin 1B2 (Stx1b2),                                                                                   | Syntaxin 2                                                                                                                                                                                                                     | syntaxin 1B2                                                                              |
| Stxbp1                | NM_013038    | 0.001             | 2.698       | Rattus norvegicus syntaxin binding protein 1 (Stxbp1), mRNA.                                                               |                                                                                                                                                                                                                                | syntaxin binding protein 1                                                                |
| Syngap1               | NM_181092    | 0.019             | 4.119       | Rattus norvegicus synaptic Ras GTPase activating protein 1 homolog (rat) (Syngap1),                                        |                                                                                                                                                                                                                                | synaptic Ras GTPase activating protein 1 homolog                                          |
| Syt1                  | NM_001033680 | 0.001             | 3.355       | Rattus norvegicus synaptotagmin I (Syt1),                                                                                  |                                                                                                                                                                                                                                | synaptotagmin 1                                                                           |
| Syt11                 | NM_031667    | 0.002             | 4.640       | Rattus norvegicus synaptotagmin XI (Syt11), mRNA.                                                                          | synaptotagmin 11                                                                                                                                                                                                               | synaptotagmin XI                                                                          |
| Tsc1                  | NM_021854    | 0.018             | 3.545       | Rattus norvegicus tuberous sclerosis 1 (Tsc1), mRNA.                                                                       |                                                                                                                                                                                                                                | tuberous sclerosis 1                                                                      |
| Wdr7                  | NM_023975    | 0.036             | 3.922       | Rattus norvegicus WD repeat domain 7 (Wdr7), mRNA.                                                                         |                                                                                                                                                                                                                                | TGF-beta resistance-associated protein                                                    |
| Cluster 4             |              |                   |             |                                                                                                                            |                                                                                                                                                                                                                                |                                                                                           |
| Gene Symbol           | Sequence ID  | Corrected P Value | Fold Change | Comments                                                                                                                   | Description                                                                                                                                                                                                                    | Function                                                                                  |
| Caskin1               | NM_080690    | 0.010             | 2.865       | Rattus norvegicus CASK interacting protein 1 (Caskin1), mRNA.                                                              |                                                                                                                                                                                                                                | cask-interacting protein 1                                                                |
| Cdk5r1                | NM_053891    | 0.020             | 3.097       | Rattus norvegicus cyclin-dependent kinase 5, regulatory subunit 1 (p35) (Cdk5r1), mRNA.                                    |                                                                                                                                                                                                                                | cyclin-dependent kinase 5, regulatory subunit 1                                           |
| Csnk1d                | NM_139060    | 0.044             | 3.002       | Rattus norvegicus casein kinase 1, delta (Csnk1d), mRNA.                                                                   |                                                                                                                                                                                                                                | casein kinase 1, delta                                                                    |
| Gnaz                  | NM_013189    | 0.006             | 3.464       | Rattus norvegicus guanine nucleotide binding protein, alpha z subunit (Gnaz), mRNA.                                        | Guanine nucleotide binding protein alpha                                                                                                                                                                                       | guanine nucleotide binding protein, alpha z subunit                                       |
| Gnb1                  | NM_030987    | 0.003             | 7.193       | Rattus norvegicus guanine nucleotide binding protein, beta 1 (Gnb1), mRNA.                                                 | Guanine nucleotide-binding protein beta 1                                                                                                                                                                                      | guanine nucleotide-binding protein, beta-1 subunit                                        |
| Lppr2                 | NM_001005881 | 0.008             | 2.780       | Rattus norvegicus plasticity related protein 4 (PRG-4), mRNA.                                                              |                                                                                                                                                                                                                                | plasticity related protein 4                                                              |
| Map4                  | NM_001024278 | 0.034             | 3.742       | Rattus norvegicus microtubule-associated protein 4 (LOC367171), mRNA.                                                      |                                                                                                                                                                                                                                | microtubule-associated protein 4                                                          |
| Nlgn2                 | NM_053992    | 0.002             | 4.894       | Rattus norvegicus neuroligin 2 (Nlgn2), mRNA.                                                                              |                                                                                                                                                                                                                                | neuroligin 2                                                                              |
| Ptprs                 | NM_019140    | 0.006             | 2.344       | Rattus norvegicus protein tyrosine phosphatase, receptor type, D (Ptprd), mRNA.                                            |                                                                                                                                                                                                                                | protein tyrosine phosphatase, receptor type, D                                            |
| Rab35                 | NM_001013046 | 0.001             | 2.318       | Rattus norvegicus RAB35, member RAS oncogene family (Rab35), mRNA.                                                         |                                                                                                                                                                                                                                | RAB35, member RAS oncogene family                                                         |
| Rab40c                | NM_182675    | 0.029             | 3.489       | Rattus norvegicus Rab40c, member RAS oncogene family (Rab40c), mRNA.                                                       | localized in perinuclear recycling compartment                                                                                                                                                                                 | Rab40c, member RAS oncogene family                                                        |
| Shroom2               | NM_001047893 | 0.034             | 3.581       | Rattus norvegicus apical protein-like (Xenopus laevis) (Apxl), mRNA.                                                       |                                                                                                                                                                                                                                | apical protein of Xenopus-like                                                            |
| Srebf2                | NM_001033694 | 0.012             | 3.674       | Rattus norvegicus sterol regulatory element binding factor 2 (predicted) (Srebf2), mRNA.                                   | sterol regulatory element binding protein 2                                                                                                                                                                                    | sterol regulatory element binding factor 2                                                |
| Ywhag                 | NM_019376    | 0.000             | 4.476       | Rattus norvegicus tyrosine 3-monooxygenase/tryptophan 5-monooxygenase activation protein, gamma polypeptide (Ywhag), mRNA. | 14-3-3 protein gamma-subtype; tyrosine 3-monooxygenase/tryptophan 5-monooxygenase activation protein gamma polypeptide; tyrosine 3/tryptophan 5-monooxygenase activation protein gamma polypeptide; 3-monooxygenase/tryptophan | tyrosine 3-monooxygenase/tryptophan 5-monooxygenase activation protein, gamma polypeptide |
| Zfp180                | NM_144757    | 0.042             | 2.940       | Rattus norvegicus zinc finger protein 180 (Zfp180), mRNA.                                                                  |                                                                                                                                                                                                                                | Cys2/His2 zinc finger protein (rKr1)                                                      |
